# Supplementary material for: Folic acid-modified mesoporous silica nanoparticles with pH-responsiveness loaded with Amp for an enhanced effect against anti-drug-resistant bacteria by overcoming efflux pump systems
Source: Royal Society of Chemistry journal article supplement (doi:10.1039/c8bm00262b), 2018-01-01
Supplement: c8bm00262b1.pdf [file c8bm00262b1.pdf]

## Supporting Information

# **Folic acid modified mesoporous silica nanoparticles with pH-responses enhance Amp anti-drug-resistant bacteria by overcoming efflux pump systems**

Xu Chen<sup>a</sup>, Ange Lin<sup>a</sup>, YaNan Liu<sup>a\*</sup>, Na Huang<sup>a</sup>, Liquan Long<sup>a</sup>, Gang Ye<sup>b\*</sup>, Jie Liu<sup>a\*</sup>

<sup>a</sup> Department of Chemistry, Jinan University, Guangzhou 510632, China

<sup>b</sup> Department of Gastroenterology, the First Affiliated Hospital of Jinan University, Guangzhou 510632, China

\*Corresponding author: Jie Liu, Department of Chemistry, Jinan University, Guangzhou, China.

E-mail address: tliuliujnu.edu.cn.

Gang Ye, Department of Gastroenterology, the First Affiliated Hospital of Jinan University, Guangzhou, China

E-mail: dr.yegang@qq.com.

YaNan Liu, Department of Gastroenterology, the First Affiliated Hospital of Jinan University, Guangzhou, China

E-mail: yananliu0321@163.com.

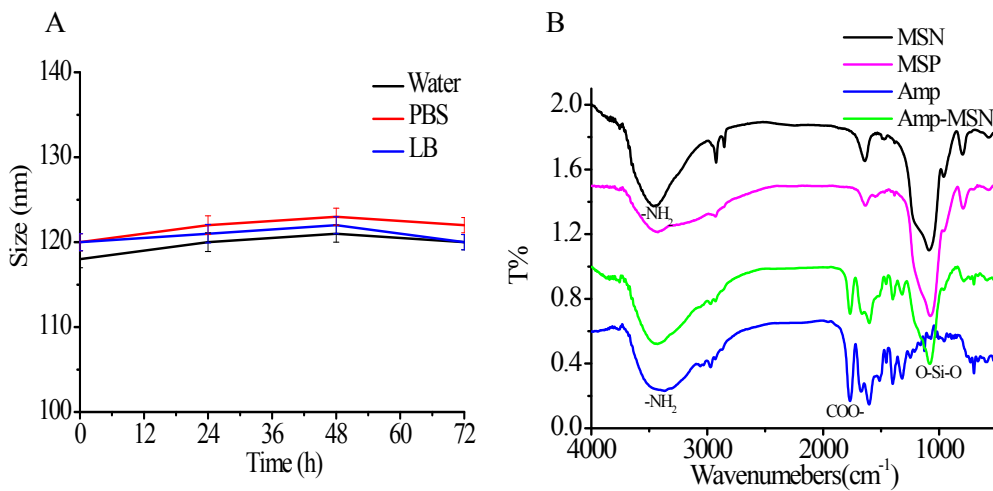

**Fig. S1.** (A) Stability of Amp-MSN@FA@CaP@FA in deionized water, PBS and LB respectively. (B) FTIR spectra of MSN, MSP, Amp and Amp-MSN.

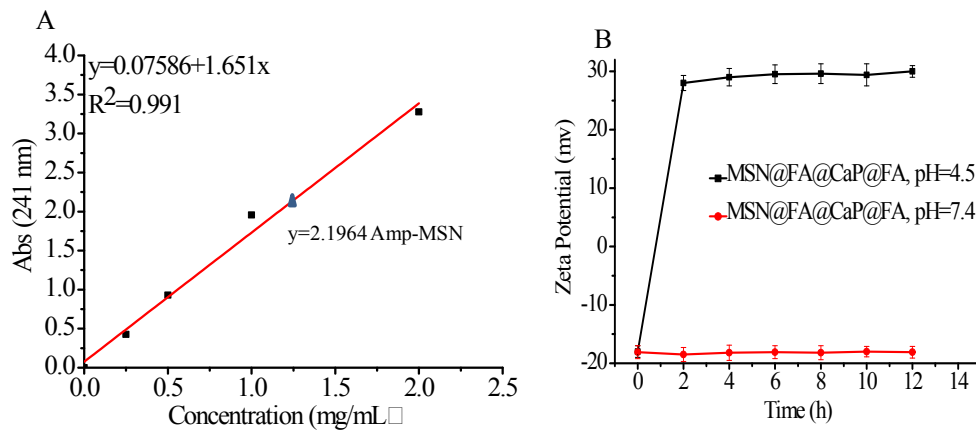

**Fig. S2.** (A) The standard curve line of different concentration Amp at 241 nm by UV-vis spectra and the loading rate of MSN test. (B) Zeta potentials of MSN@FA@CaP@FA with different incubation times at pH=7.4, and 4.5 (means  $\pm$  SD, n = 3).

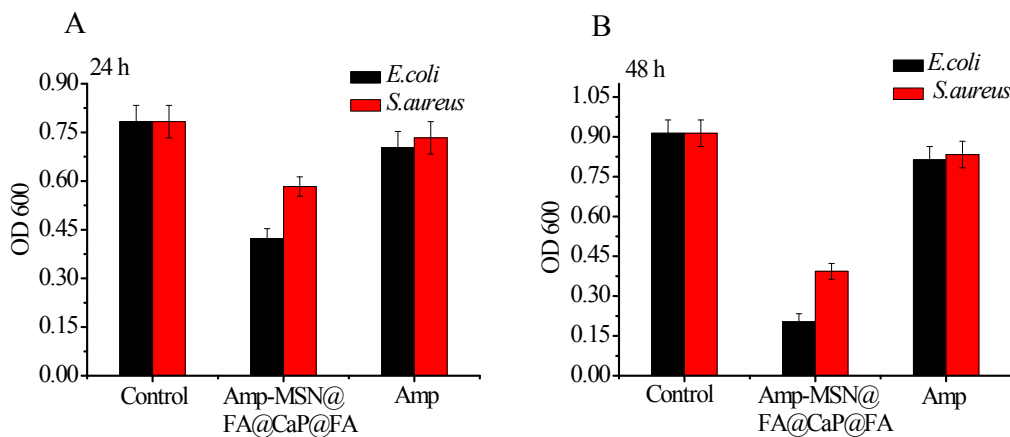

**Fig.S3** The OD 600 value of *E. coli* (A) and *S. aureus* (B) after treatments with Amp-MSN@FA@CaP@FA and single Amp composites with 24 h and 48 h respectively ( $p^* = 0.05$ ).

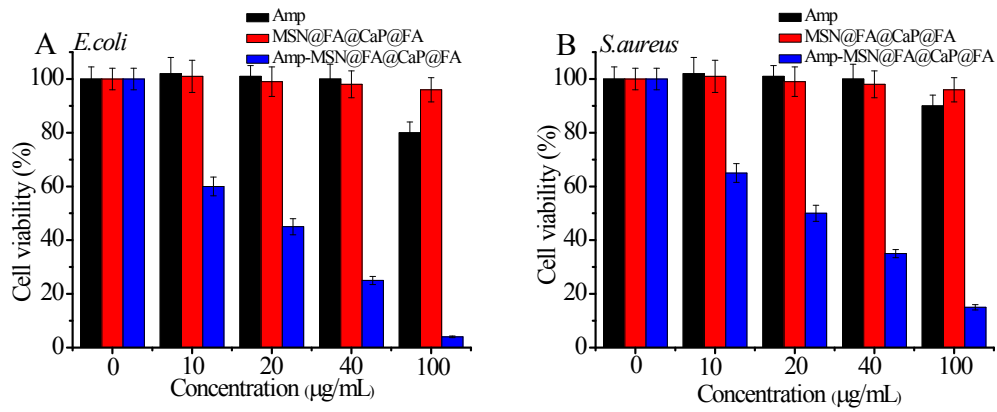

**Fig.S4** The Bacterial cell viability of *E. coli* (A) and *S. aureus* (B) after treatments with Amp-MSN@FA@CaP@FA and single Amp composites at variable concentrations (p \*=0.05).

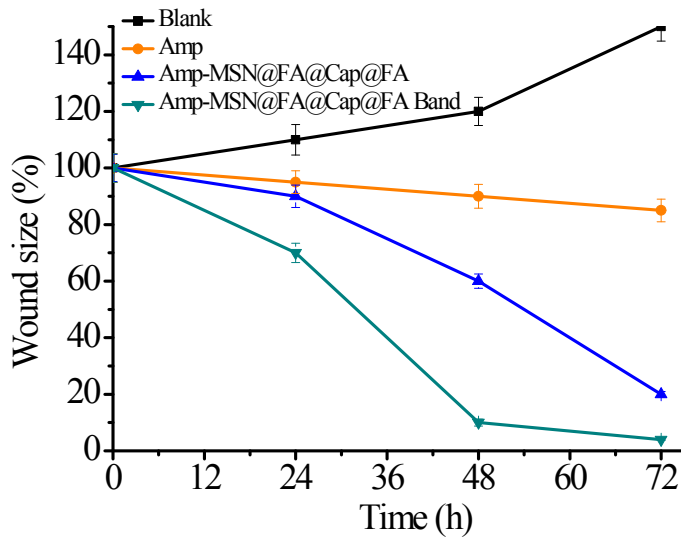

**Fig.S5** The *S. aureus* -infected corresponding wound sizes (relative area versus minimal area). Error bars represent the standard deviation of three repeated measurements (p \*=0.05).

**Table S1** The MIC value of Amp-MSN@FA@CaP@FA and Amp

| Bacterial        | MIC value (µg/mL) |      |
|------------------|-------------------|------|
|                  | Amp-MSN@FA@CaP@FA | Amp  |
| <i>E. coli</i>   | 10                | >100 |
| <i>S. aureus</i> | 10                | >100 |
